# Supplementary material
Source: publisher figshare collection journal article supplement (https://frontiersin.figshare.com/ndownloader/files/25608629)
Supplement: Supplementary file 1 [file 25608629]

## Sheet: Sheet1
	Bn	Bn uncert.	Bn	Bn uncert.			Bn	Bn uncert	Bn	Bn uncert.
	Gt a-1	Gt a-1	mm*10-3 SLE a-1	mm*10-3 SLE a-1			Gt a-1	Gt a-1	mm*10-3 SLE a-1	mm*10-3 SLE a-1
1900/01 - 1989/90	-3.061	1.06	-8.44414	2.92414		1996/97	-21.4455	1.6838	-59.1599	4.64496
1970/71 - 2017/18	-4.3	0.993	-11.8621	2.73931		1997/98	-13.5951	1.6471	-37.5037	4.54372
1992/93 - 2017/18	-8.266	0.81	-22.8028	2.23448		1998/99	-9.75295	1.64638	-26.9047	4.54173
2005/06 - 2017/18	-7.55494	0.796547	-20.8412	2.19737		1999/00	-11.9915	1.64564	-33.08	4.53969
1890/91 - 2018/19	-4.21	1.02764	-11.6138	2.83487		2000/01	-10.2287	1.64126	-28.2172	4.5276
1994/95 - 2018/19	-9.6176	0.80768	-26.5313	2.22808		2001/02	-8.28436	1.63688	-22.8534	4.51552
2005/06 - 2014/15	-8.42771	0.8	-23.2488	2.2069		2002/03	-11.937	1.6325	-32.9296	4.50344
1980/81 - 1993/94	1.53323	1	4.22961	2.75862		2003/04	-14.3036	1.62812	-39.4581	4.49135
						2004/05	-15.7278	1.62372	-43.387	4.47922
						2005/06	-10.9851	1.61932	-30.3036	4.46709
						2006/07	-9.10984	1.61492	-25.1306	4.45496
						2007/08	-10.1476	1.61051	-27.9933	4.44278
						2008/09	-5.34728	1.6061	-14.7511	4.43063
						2009/10	-26.191	1.6017	-72.2511	4.41848
						2010/11	-3.48931	1.59729	-9.62568	4.40633
						2011/12	-9.77681	1.59281	-26.9705	4.39395
						2012/13	-4.41577	1.58832	-12.1814	4.38157
						2013/14	-10.4811	1.58382	-28.9134	4.36915
						2014/15	5.66673	1.57978	15.6324	4.35802
						2015/16	-8.88295	1.57575	-24.5047	4.34689
						2016/17	-3.15511	1.57172	-8.70376	4.33577
						2017/18	-1.91046	1.56821	-5.27023	4.3261
						2018/19	-15.0057	1.56471	-41.395	4.31644
